# Supplementary material for: Palbociclib Combined with an Aromatase Inhibitor in Patients with Breast Cancer with Lung or Liver Metastases in US Clinical Practice
Source: MDPI journal article supplement (doi:10.3390/cancers15215268), 2023-11-02

## Supplementary Materials

**Table S1.** Baseline and clinical characteristics of patients with lung and/or liver metastases.

| Characteristic                                    | Unadjusted                    |                       |          | sIPTW                         |                       |          | PSM                           |                       |          |
|---------------------------------------------------|-------------------------------|-----------------------|----------|-------------------------------|-----------------------|----------|-------------------------------|-----------------------|----------|
|                                                   | Palbociclib + AI<br>(n = 480) | AI Alone<br>(n = 411) | Std Diff | Palbociclib + AI<br>(n = 524) | AI Alone<br>(n = 428) | Std Diff | Palbociclib + AI<br>(n = 256) | AI Alone<br>(n = 256) | Std Diff |
| Age at mBC diagnosis, years <sup>a</sup>          |                               |                       |          |                               |                       |          |                               |                       |          |
| Mean (SD)                                         | 65.5 (11.0)                   | 70.6 (9.7)            | -0.4959  | 67.6 (11.5)                   | 68.2 (10.6)           | -0.0590  | 68.1 (10.7)                   | 69.4 (9.4)            | -0.1335  |
| Median (IQR)                                      | 66 (14)                       | 71 (16)               |          | 69 (17)                       | 69 (16)               |          | 69 (16)                       | 70 (16)               |          |
| Female sex <sup>a</sup> n (%)                     | 476 (99.2)                    | 403 (98.1)            | -0.0952  | 515 (98.3)                    | 422 (98.6)            | 0.0223   | 253 (98.8)                    | 254 (99.2)            | 0.0397   |
| Race <sup>a</sup> n (%)                           |                               |                       |          |                               |                       |          |                               |                       |          |
| White                                             | 331 (69.0)                    | 256 (62.3)            | 0.1408   | 350 (66.8)                    | 286 (66.9)            | -0.0023  | 164 (64.1)                    | 180 (70.3)            | -0.1334  |
| Black                                             | 31 (6.5)                      | 39 (9.5)              | -0.1121  | 39 (7.4)                      | 31 (7.3)              | 0.0016   | 18 (7.0)                      | 13 (5.1)              | 0.0820   |
| Other                                             | 118 (24.6)                    | 116 (28.2)            | -0.0827  | 135 (25.8)                    | 110 (25.8)            | 0.0016   | 74 (28.9)                     | 63 (24.6)             | 0.0972   |
| Practice type                                     |                               |                       |          |                               |                       |          |                               |                       |          |
| Community                                         | 441 (91.9)                    | 376 (91.5)            | 0.0142   | 481 (91.8)                    | 392 (91.6)            | 0.0059   | 227 (88.7)                    | 233 (91.0)            | -0.0776  |
| Academic                                          | 39 (8.1)                      | 35 (8.5)              |          | 43 (8.2)                      | 36 (8.4)              |          | 29 (11.3)                     | 23 (9.0)              |          |
| mBC disease stage at initial diagnosis, n (%)     |                               |                       |          |                               |                       |          |                               |                       |          |
| I                                                 | 63 (13.1)                     | 58 (14.1)             | -0.0288  | 71 (13.6)                     | 58 (13.5)             | 0.0033   | 36 (14.1)                     | 40 (15.6)             | -0.0440  |
| II                                                | 135 (28.1)                    | 92 (22.4)             | 0.1324   | 135 (25.7)                    | 113 (26.3)            | -0.0150  | 76 (29.7)                     | 70 (27.3)             | 0.0519   |
| III                                               | 53 (11.0)                     | 64 (15.6)             | -0.1337  | 68 (12.9)                     | 57 (13.3)             | -0.0110  | 28 (10.9)                     | 31 (12.1)             | -0.0367  |
| IV                                                | 185 (38.5)                    | 145 (35.3)            | 0.0676   | 190 (36.2)                    | 153 (35.8)            | 0.0089   | 87 (34.0)                     | 87 (34.0)             | 0.0000   |
| Not documented                                    | 44 (9.2)                      | 52 (12.7)             | -0.1120  | 61 (11.6)                     | 47 (11.1)             | 0.0153   | 29 (11.3)                     | 28 (10.9)             | 0.0124   |
| ECOG PS <sup>a</sup> n (%)                        |                               |                       |          |                               |                       |          |                               |                       |          |
| 0                                                 | 189 (39.4)                    | 94 (22.9)             | 0.3623   | 166 (31.6)                    | 134 (31.3)            | 0.0068   | 72 (28.1)                     | 76 (29.7)             | -0.0345  |
| 1                                                 | 112 (23.3)                    | 87 (21.2)             | 0.0521   | 119 (22.6)                    | 93 (21.8)             | 0.0210   | 54 (21.1)                     | 57 (22.3)             | -0.0284  |
| 2, 3, or 4                                        | 55 (11.5)                     | 78 (19.0)             | -0.2105  | 80 (15.2)                     | 66 (15.3)             | -0.0045  | 38 (14.8)                     | 38 (14.8)             | 0.0000   |
| Not documented                                    | 124 (25.8)                    | 152 (37.0)            | -0.2420  | 160 (30.6)                    | 135 (31.6)            | -0.0223  | 92 (35.9)                     | 85 (33.2)             | 0.0575   |
| Bone-only metastasis <sup>a,b</sup> n (%)         | 0                             | 0                     | 0        | 0                             | 0                     | 0        | 0                             | 0                     | 0        |
| Brain metastasis, n (%)                           | 22 (4.6)                      | 19 (4.6)              | 0.0019   | 23 (4.3)                      | 26 (6.1)              | 0.0801   | 12 (4.7)                      | 16 (6.3)              | 0.0688   |
| Disease-free interval, years <sup>a,c</sup> n (%) |                               |                       |          |                               |                       |          |                               |                       |          |
| De novo mBC                                       | 185 (38.5)                    | 145 (35.3)            | 0.0676   | 190 (36.2)                    | 153 (35.8)            | 0.0089   | 87 (34.0)                     | 87 (34.0)             | 0.0000   |
| ≤1                                                | 12 (2.5)                      | 12 (2.9)              | -0.0259  | 12 (2.2)                      | 11 (2.5)              | -0.0214  | 5 (2.0)                       | 4 (1.6)               | 0.0297   |
| >1–5                                              | 66 (13.8)                     | 97 (23.6)             | -0.2548  | 73 (14.0)                     | 108 (25.3)            | -0.2863  | 39 (15.2)                     | 67 (26.2)             | -0.2724  |
| >5                                                | 217 (45.2)                    | 156 (38.0)            | 0.1475   | 249 (47.6)                    | 155 (36.2)            | 0.2315   | 125 (48.8)                    | 98 (38.3)             | 0.2139   |
| Not documented                                    | 0                             | 1 (0.2)               | -0.0698  | 0                             | 1 (0.2)               | -0.0622  | 0                             | 0                     | 0        |
| NCI comorbidity index, mean (SD)                  | 0.27 (0.47)                   | 0.36 (0.52)           | -0.2001  | 0.30 (0.54)                   | 0.33 (0.49)           | -0.0490  | 0.28 (0.48)                   | 0.33 (0.48)           | -0.1160  |
| Number of metastatic sites <sup>a,d</sup> n (%)   |                               |                       |          |                               |                       |          |                               |                       |          |
| 1                                                 | 85 (17.7)                     | 93 (22.6)             | -0.1228  | 104 (19.9)                    | 84 (19.7)             | 0.0054   | 45 (17.6)                     | 46 (18.0)             | -0.0102  |
| 2                                                 | 169 (35.2)                    | 160 (38.9)            | -0.0771  | 197 (37.6)                    | 163 (38.0)            | -0.0074  | 101 (39.5)                    | 98 (38.3)             | 0.0240   |
| 3                                                 | 139 (29.0)                    | 107 (26.0)            | 0.0655   | 136 (26.0)                    | 122 (28.6)            | -0.0592  | 70 (27.3)                     | 73 (28.5)             | -0.0261  |
| 4                                                 | 53 (11.0)                     | 28 (6.8)              | 0.1487   | 51 (9.8)                      | 30 (7.0)              | 0.1022   | 30 (11.7)                     | 23 (9.0)              | 0.0899   |
| ≥5                                                | 34 (7.1)                      | 23 (5.6)              | 0.0611   | 35 (6.7)                      | 29 (6.8)              | -0.0020  | 10 (3.9)                      | 16 (6.3)              | -0.1069  |
| Median follow-up duration (IQR), months           | 24.5 (23.7)                   | 20.5 (28.2)           |          | 24.2 (24.0)                   | 21.4 (27.2)           |          | 24.0 (23.9)                   | 21.2 (26.8)           |          |

<sup>a</sup>Variable used in propensity score estimation. <sup>b</sup>Bone-only disease was defined as metastatic disease in the bone only. <sup>c</sup>Time from the initial diagnosis to mBC diagnosis. <sup>d</sup>Multiple metastases at the same site were counted as one site (eg, if a patient had three bone metastases in the spine, it was considered only one site).

AI, aromatase inhibitor; ECOG PS, Eastern Cooperative Oncology Group performance status; IQR, interquartile range; mBC, metastatic breast cancer; NCI, National Cancer Institute; PSM, propensity score matching; SD, standard deviation; sIPTW, stabilized inverse probability of treatment weighting; Std Diff, standardized difference.

**Figure S1.** OS for patients with lung and/or liver metastases in the unadjusted (A), sIPTW (B), and PSM (C) analyses. AI, aromatase inhibitor; CI, confidence interval; OS, overall survival; PAL, palbociclib; PSM, propensity score matching; sIPTW, stabilized inverse probability of treatment weighting.

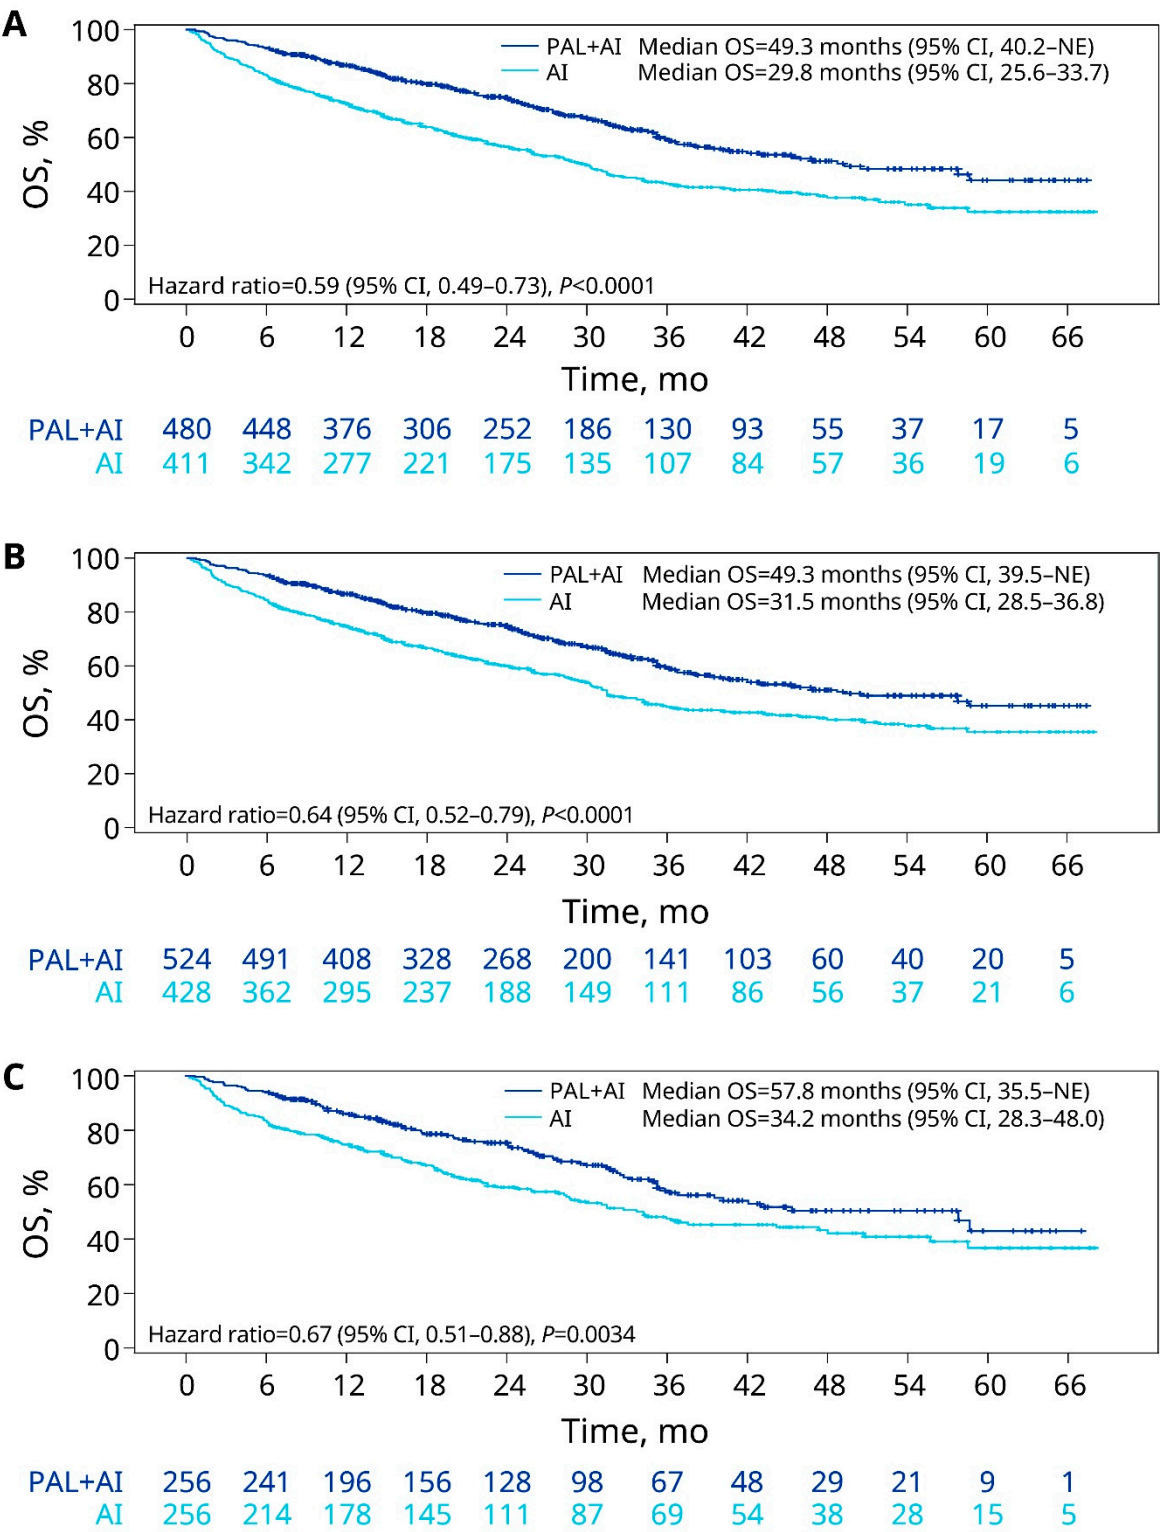

**Figure S2.** rwPFS for patients with lung and/or liver metastases in the unadjusted (A), sIPTW (B), and PSM (C) analyses. AI, aromatase inhibitor; CI, confidence interval; PAL, palbociclib; PSM, propensity score matching; rwPFS, real-world progression-free survival; sIPTW, stabilized inverse probability of treatment weighting.

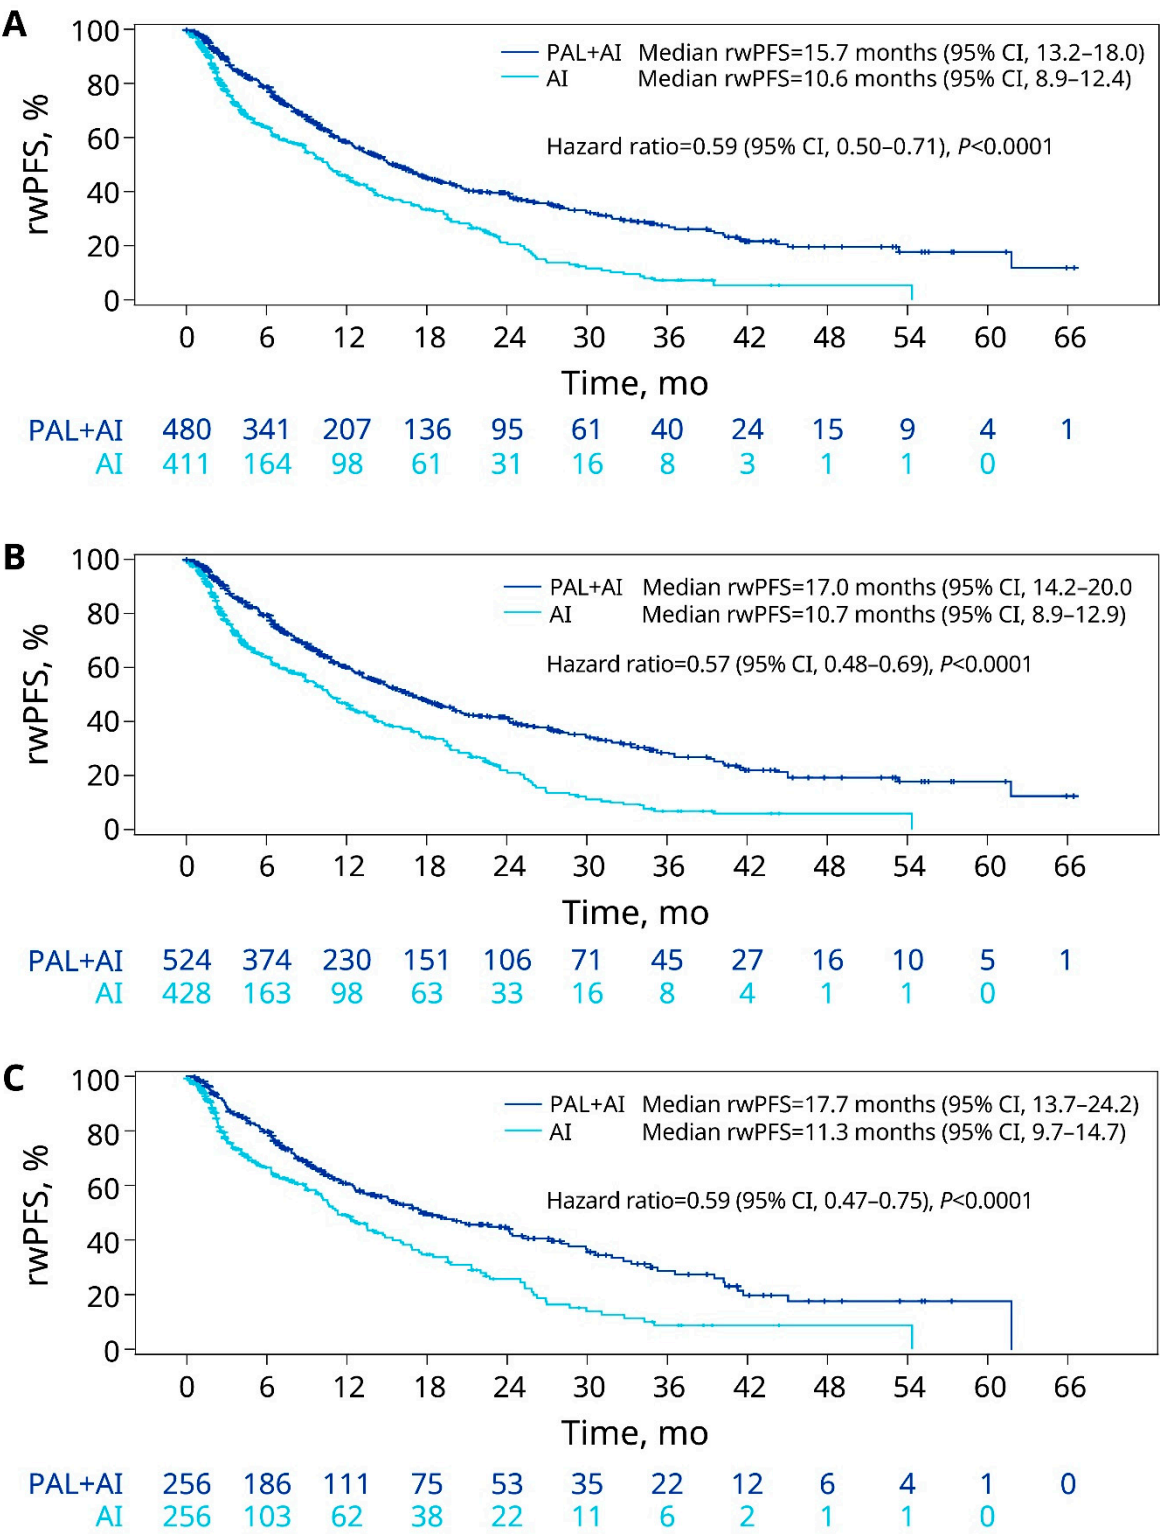

Supplement: s1 [file s1]
